# Supplementary material
Source: publisher site journal article supplement (https://www.dovepress.com/article/403945)
Supplement: Supplementary file 1 [file get_supplementary_file.php]

Table S1 The basic characteristics of population data in each group

| Group | Gender  (male/female) | Age  (years) | AST  (IU/L) | ALT  (IU/L) | MCs  (ng/mL) |
| --- | --- | --- | --- | --- | --- |
| 5 ng/mL | 14/16 | 36.25±10.16 | 20.29±6.30 | 22.14±13.86 | 5.60±0.74 |
| 25 ng/mL | 15/15 | 38.21±15.18 | 23.04±6.05 | 28.17±18.65 | 24.76±2.30 |
| 125 ng/mL | 15/15 | 36.96±9.95 | 25.11±9.67 | 33.93±23.41 | 124.68±18.77 |
| F, *p-*value |  | F=0.185, *P*>0.05 | F=2.791, *P*>0.05 | F=2.586, *P*>0.05 | F=851.7, *P*<0.001 |

All data are presented as ±s.
